# Supplementary material
Source: Springer Nature journal article supplement (https://www.springermedizin.de/resource/supplementary/12879_2010_1621_MOESM5_ESM.pdf/9442916)
Supplement: MOESM5 [file 9442916]

Reader 2: acid-fast bacilli per 100 microscopy fields

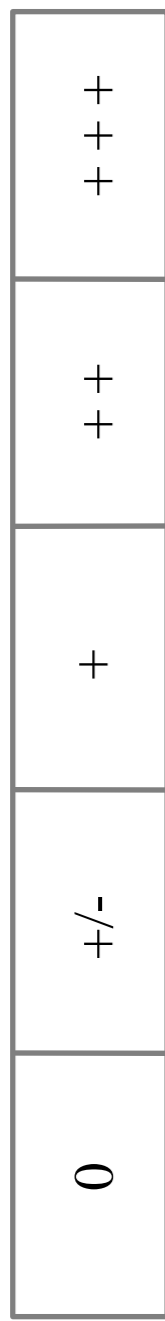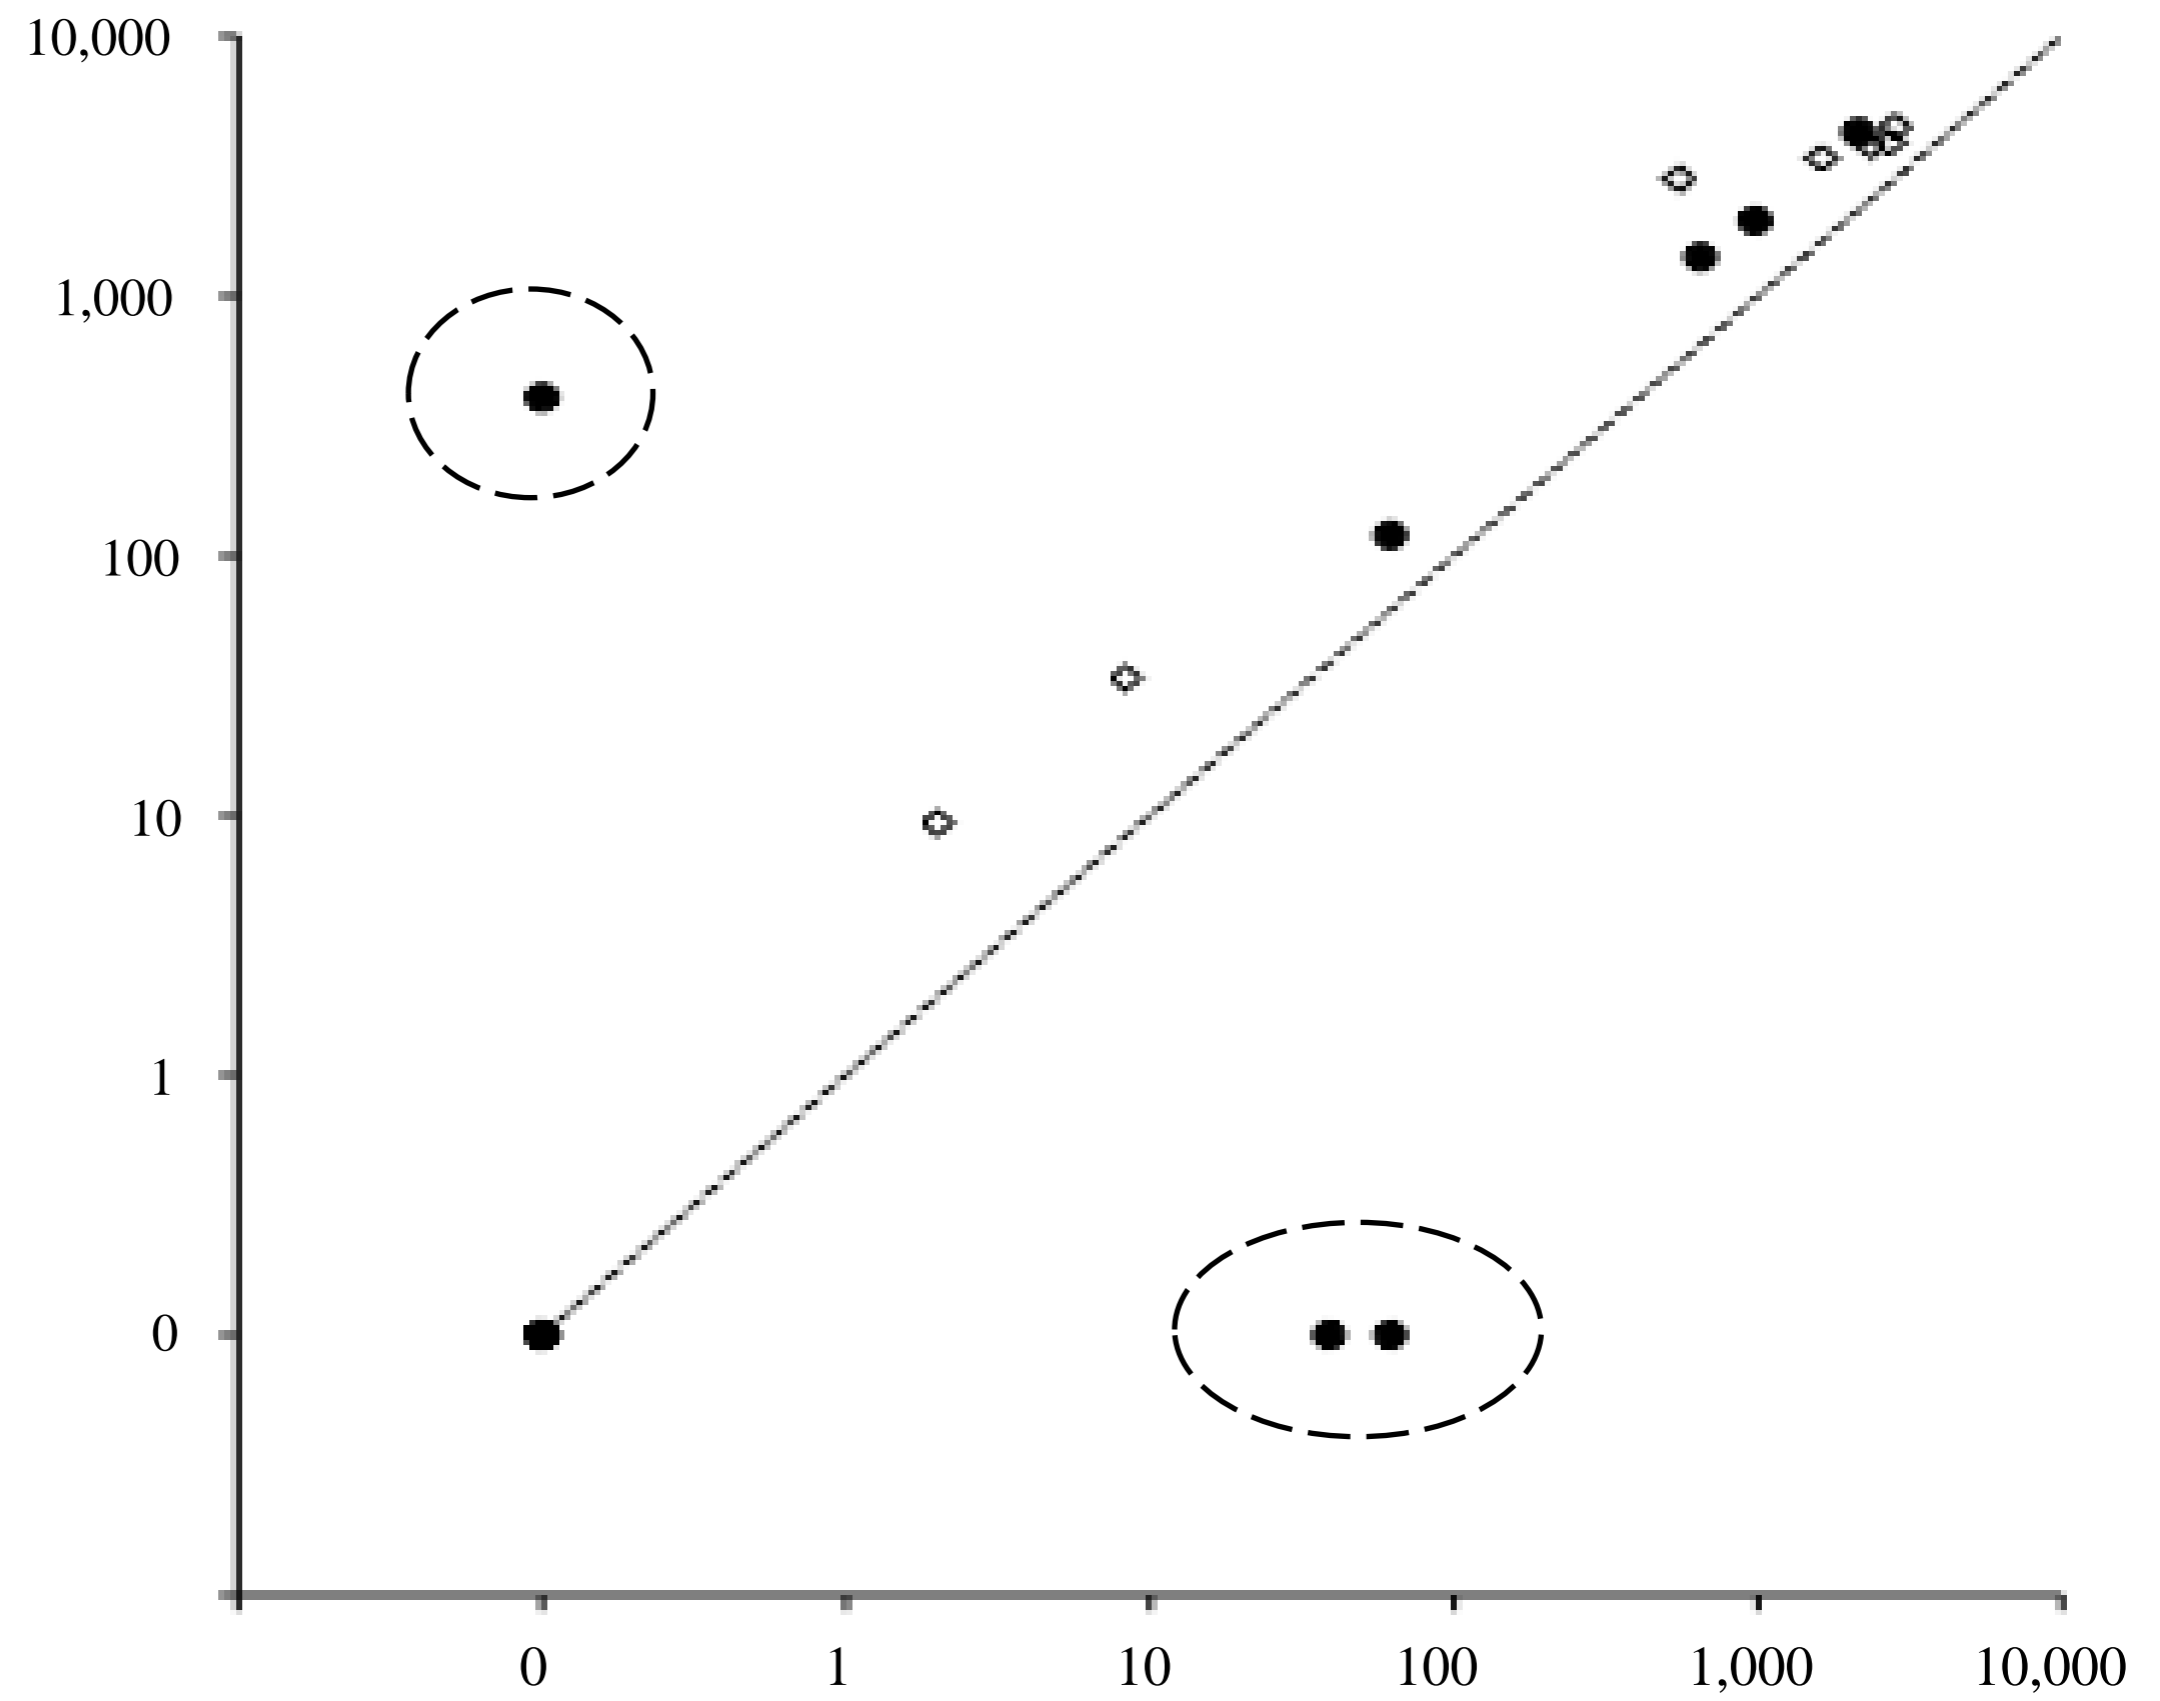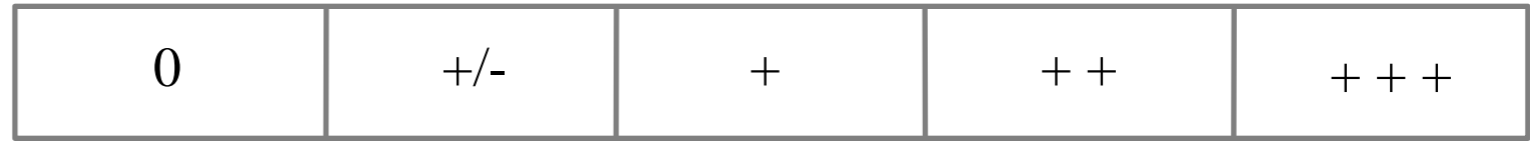

Reader 1: acid-fast bacilli per 100 microscopy fields
